# Supplementary material
Source: Springer Nature journal article supplement (https://www.springermedizin.de/resource/supplementary/13018_2009_167_MOESM2_ESM.pdf/9636456)

# Mechanism of vascular injuries

Supracondylar fractures

Penetrating lesions

13.6%

31.8%

25%

29.6%

Multiple trauma

Isolated severe extremity trauma

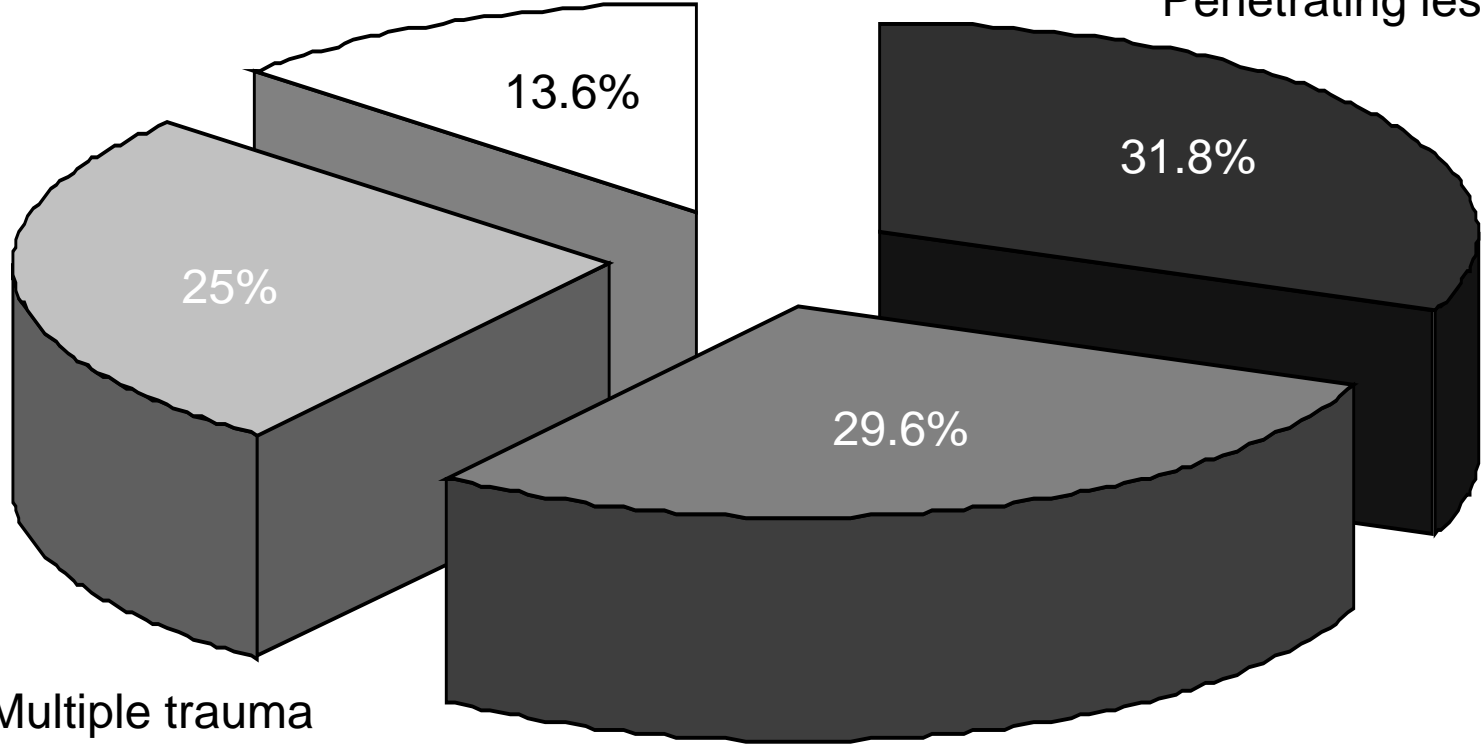

Supplement: MOESM2 [file 9636456]
